# Supplementary material for: A Targeted “Next-Generation” Sequencing-Informatic Approach to Define Genetic Diversity in Theileria orientalis Populations within Individual Cattle: Proof-of-Principle
Source: MDPI journal article supplement (doi:10.3390/pathogens9060448), 2020-06-05
Supplement: s1 [file s1]

**Figure S1.** Nucleotide alignments of the sequence variants for the *Theileria orientalis* complex (including genotypes: *buffeli*, *chitose* (A & B) and *ikedai*), produced by targeted NGS using a region of the major piroplasm surface protein gene (*MPSP*). Alignments are compared to the most frequent sequence variant for each genotype. Synonymous nucleotide changes are in bold, and nonsynonymous amino acid changes are highlighted in colour. Genotypes *type 4* and *type 5* were omitted here, as only three sequences were recorded.

*buffeli*

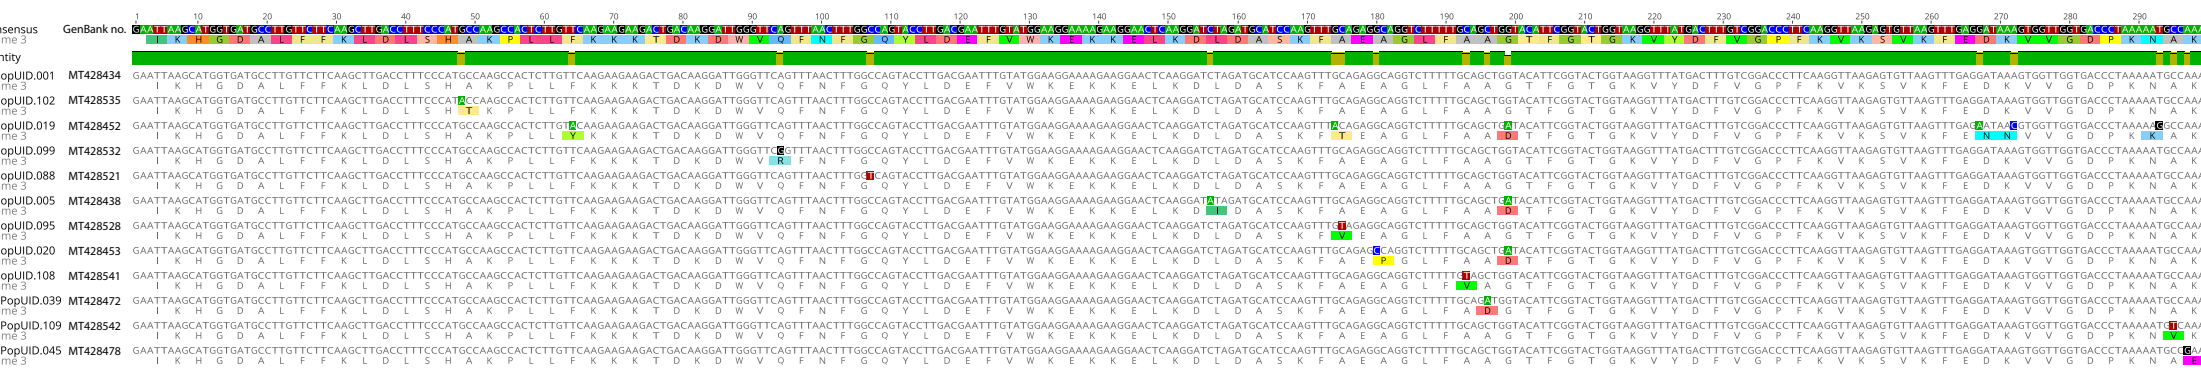

***chitose* A**

Consensus  
Frame 3

GenBank no.

1102030405060708090100110120130140150160170180190200210220230240250260270280290301

Identity

1. PopUID.003  
Frame 3

MT428436

GACTGAAGCATCTGAAGACCTGTTCTTAAAGTCGACCTTCCCATCAAAACCACTTTTGTTCAGAAAGAAAGGAGCAAGGAATGGTACAGTTCAAGTTCGCTCCGCAAGTCTCGATGAAGTCTCTCTGGAAGAAAGAAAGGAATCAAGACCTGATGCTCAAGTTCTGCAAGAGCTGGCTCTTTTGCCCTGATGACTCGTACCGGAAAGTTTACAGCTTCGTGCGAAATCTCAAGTCAACAAGTCAAGTTTCGAGGATAAGGAAGTCGGAAATCAAGAAGGCCCAATA

LKHAEDLFLFKL DLSHAKPLLFKKKSDKEWVQFSFAQYLD EVLWKKEKKESESKDLDASKF AEAGLFAPDAFGTGK VYDFVGNFKVTKVKVKEFDEK EVDGSKKAK

2. PopUID.070  
Frame 3

MT428503

GACTGAAGCATCTGAAGACCTGTTCTTAAAGTCGACCTTCCCATCAAAACCACTTTTGTTCAGAAAGAAAGGAGCAAGGAATGGTACAGTTCAAGTTCGCTCCGCAAGTCTCGATGAAGTCTCTCTGGAAGAAAGAAAGGAATCAAGACCTGATGCTCAAGTTCTGCAAGAGCTGGCTCTTTTGCCCTGATGACTCGTACCGGAAAGTTTACAGCTTCGTGCGAAATCTCAAGTCAACAAGTCAAGTTTCGAGGATAAGGAAGTCGGAAATCAAGAAGGCCCAATA

LKHAEDLFLFKL DLSHAKPLLFKKKSDKEWVQFSFAQYLD EVLWKKEKKESESKDLDASKF AEAGLFAPDAFGTGK VYDFVGNFKVTKVKVKEFDEK EVDGSKKAK

3. PopUID.079  
Frame 3

MT428512

GACTGAAGCATCTGAAGACCTGTTCTTAAAGTCGACCTTCCCATCAAAACCACTTTTGTTCAGAAAGAAAGGAGCAAGGAATGGTACAGTTCAAGTTCGCTCCGCAAGTCTCGATGAAGTCTCTCTGGAAGAAAGAAAGGAATCAAGACCTGATGCTCAAGTTCTGCAAGAGCTGGCTCTTTTGCCCTGATGACTCGTACCGGAAAGTTTACAGCTTCGTGCGAAATCTCAAGTCAACAAGTCAAGTTTCGAGGATAAGGAAGTCGGAAATCAAGAAGGCCCAATA

LKHAEDLFLFKL DLSHAKPLLFKKKSDKEWVQFSFAQYLD EVLWKKEKKESESKDLDASKF AEAGLFAPDAFGTGK VYDFVGNFKVTKVKVKEFDEK EVDGSKKAK

4. PopUID.063  
Frame 3

MT428496

GACTGAAGCATCTGAAGACCTGTTCTTAAAGTCGACCTTCCCATCAAAACCACTTTTGTTCAGAAAGAAAGGAGCAAGGAATGGTACAGTTCAAGTTCGCTCCGCAAGTCTCGATGAAGTCTCTCTGGAAGAAAGAAAGGAATCAAGACCTGATGCTCAAGTTCTGCAAGAGCTGGCTCTTTTGCCCTGATGACTCGTACCGGAAAGTTTACAGCTTCGTGCGAAATCTCAAGTCAACAAGTCAAGTTTCGAGGATAAGGAAGTCGGAAATCAAGAAGGCCCAATA

LKHAEDLFLFKL DLSHAKPLLFKKKSDKEWVQFSFAQYLD EVLWKKEKKESESKDLDASKF AEAGLFAPDAFGTGK VYDFVGNFKVTKVKVKEFDEK EVDGSKKAK

5. PopUID.083  
Frame 3

MT428516

GACTGAAGCATCTGAAGACCTGTTCTTAAAGTCGACCTTCCCATCAAAACCACTTTTGTTCAGAAAGAAAGGAGCAAGGAATGGTACAGTTCAAGTTCGCTCCGCAAGTCTCGATGAAGTCTCTCTGGAAGAAAGAAAGGAATCAAGACCTGATGCTCAAGTTCTGCAAGAGCTGGCTCTTTTGCCCTGATGACTCGTACCGGAAAGTTTACAGCTTCGTGCGAAATCTCAAGTCAACAAGTCAAGTTTCGAGGATAAGGAAGTCGGAAATCAAGAAGGCCCAATA

LKHAEDLFLFKL DLSHAKPLLFKKKSDKEWVQFSFAQYLD EVLWKKEKKESESKDLDASKF AEAGLFAPDAFGTGK VYDFVGNFKVTKVKVKEFDEK EVDGSKKAK

6. PopUID.072  
Frame 3

MT428505

GACTGAAGCATCTGAAGACCTGTTCTTAAAGTCGACCTTCCCATCAAAACCACTTTTGTTCAGAAAGAAAGGAGCAAGGAATGGTACAGTTCAAGTTCGCTCCGCAAGTCTCGATGAAGTCTCTCTGGAAGAAAGAAAGGAATCAAGACCTGATGCTCAAGTTCTGCAAGAGCTGGCTCTTTTGCCCTGATGACTCGTACCGGAAAGTTTACAGCTTCGTGCGAAATCTCAAGTCAACAAGTCAAGTTTCGAGGATAAGGAAGTCGGAAATCAAGAAGGCCCAATA

LKHAEDLFLFKL DLSHAKPLLFKKKSDKEWVQFSFAQYLD EVLWKKEKKESESKDLDASKF AEAGLFAPDAFGTGK VYDFVGNFKVTKVKVKEFDEK EVDGSKKAK

7. PopUID.084  
Frame 3

MT428517

GACTGAAGCATCTGAAGACCTGTTCTTAAAGTCGACCTTCCCATCAAAACCACTTTTGTTCAGAAAGAAAGGAGCAAGGAATGGTACAGTTCAAGTTCGCTCCGCAAGTCTCGATGAAGTCTCTCTGGAAGAAAGAAAGGAATCAAGACCTGATGCTCAAGTTCTGCAAGAGCTGGCTCTTTTGCCCTGATGACTCGTACCGGAAAGTTTACAGCTTCGTGCGAAATCTCAAGTCAACAAGTCAAGTTTCGAGGATAAGGAAGTCGGAAATCAAGAAGGCCCAATA

LKHAEDLFLFKL DLSHAKPLLFKKKSDKEWVQFSFAQYLD EVLWKKEKKESESKDLDASKF AEAGLFAPDAFGTGK VYDFVGNFKVTKVKVKEFDEK EVDGSKKAK

8. PopUID.092  
Frame 3

MT428525

GACTGAAGCATCTGAAGACCTGTTCTTAAAGTCGACCTTCCCATCAAAACCACTTTTGTTCAGAAAGAAAGGAGCAAGGAATGGTACAGTTCAAGTTCGCTCCGCAAGTCTCGATGAAGTCTCTCTGGAAGAAAGAAAGGAATCAAGACCTGATGCTCAAGTTCTGCAAGAGCTGGCTCTTTTGCCCTGATGACTCGTACCGGAAAGTTTACAGCTTCGTGCGAAATCTCAAGTCAACAAGTCAAGTTTCGAGGATAAGGAAGTCGGAAATCAAGAAGGCCCAATA

LKHAEDLFLFKL DLSHAKPLLFKKKSDKEWVQFSFAQYLD EVLWKKEKKESESKDLDASKF AEAGLFAPDAFGTGK VYDFVGNFKVTKVKVKEFDEK EVDGSKKAK

9. PopUID.075  
Frame 3

MT428508

GACTGAAGCATCTGAAGACCTGTTCTTAAAGTCGACCTTCCCATCAAAACCACTTTTGTTCAGAAAGAAAGGAGCAAGGAATGGTACAGTTCAAGTTCGCTCCGCAAGTCTCGATGAAGTCTCTCTGGAAGAAAGAAAGGAATCAAGACCTGATGCTCAAGTTCTGCAAGAGCTGGCTCTTTTGCCCTGATGACTCGTACCGGAAAGTTTACAGCTTCGTGCGAAATCTCAAGTCAACAAGTCAAGTTTCGAGGATAAGGAAGTCGGAAATCAAGAAGGCCCAATA

LKHAEDLFLFKL DLSHAKPLLFKKKSDKEWVQFSFAQYLD EVLWKKEKKESESKDLDASKF AEAGLFAPDAFGTGK VYDFVGNFKVTKVKVKEFDEK EVDGSKKAK

10. PopUID.076  
Frame 3

MT428509

GACTGAAGCATCTGAAGACCTGTTCTTAAAGTCGACCTTCCCATCAAAACCACTTTTGTTCAGAAAGAAAGGAGCAAGGAATGGTACAGTTCAAGTTCGCTCCGCAAGTCTCGATGAAGTCTCTCTGGAAGAAAGAAAGGAATCAAGACCTGATGCTCAAGTTCTGCAAGAGCTGGCTCTTTTGCCCTGATGACTCGTACCGGAAAGTTTACAGCTTCGTGCGAAATCTCAAGTCAACAAGTCAAGTTTCGAGGATAAGGAAGTCGGAAATCAAGAAGGCCCAATA

LKHAEDLFLFKL DLSHAKPLLFKKKSDKEWVQFSFAQYLD EVLWKKEKKESESKDLDASKF AEAGLFAPDAFGTGK VYDFVGNFKVTKVKVKEFDEK EVDGSKKAK

11. PopUID.080  
Frame 3

MT428513

GACTGAAGCATCTGAAGACCTGTTCTTAAAGTCGACCTTCCCATCAAAACCACTTTTGTTCAGAAAGAAAGGAGCAAGGAATGGTACAGTTCAAGTTCGCTCCGCAAGTCTCGATGAAGTCTCTCTGGAAGAAAGAAAGGAATCAAGACCTGATGCTCAAGTTCTGCAAGAGCTGGCTCTTTTGCCCTGATGACTCGTACCGGAAAGTTTACAGCTTCGTGCGAAATCTCAAGTCAACAAGTCAAGTTTCGAGGATAAGGAAGTCGGAAATCAAGAAGGCCCAATA

LKHAEDLFLFKL DLSHAKPLLFKKKSDKEWVQFSFAQYLD EVLWKKEKKESESKDLDASKF AEAGLFAPDAFGTGK VYDFVGNFKVTKVKVKEFDEK EVDGSKKAK

12. PopUID.089  
Frame 3

MT428522

GACTGAAGCATCTGAAGACCTGTTCTTAAAGTCGACCTTCCCATCAAAACCACTTTTGTTCAGAAAGAAAGGAGCAAGGAATGGTACAGTTCAAGTTCGCTCCGCAAGTCTCGATGAAGTCTCTCTGGAAGAAAGAAAGGAATCAAGACCTGATGCTCAAGTTCTGCAAGAGCTGGCTCTTTTGCCCTGATGACTCGTACCGGAAAGTTTACAGCTTCGTGCGAAATCTCAAGTCAACAAGTCAAGTTTCGAGGATAAGGAAGTCGGAAATCAAGAAGGCCCAATA

LKHAEDLFLFKL DLSHAKPLLFKKKSDKEWVQFSFAQYLD EVLWKKEKKESESKDLDASKF AEAGLFAPDAFGTGK VYDFVGNFKVTKVKVKEFDEK EVDGSKKAK

13. PopUID.057  
Frame 3

MT428490

GACTGAAGCATCTGAAGACCTGTTCTTAAAGTCGACCTTCCCATCAAAACCACTTTTGTTCAGAAAGAAAGGAGCAAGGAATGGTACAGTTCAAGTTCGCTCCGCAAGTCTCGATGAAGTCTCTCTGGAAGAAAGAAAGGAATCAAGACCTGATGCTCAAGTTCTGCAAGAGCTGGCTCTTTTGCCCTGATGACTCGTACCGGAAAGTTTACAGCTTCGTGCGAAATCTCAAGTCAACAAGTCAAGTTTCGAGGATAAGGAAGTCGGAAATCAAGAAGGCCCAATA

LKHAEDLFLFKL DLSHAKPLLFKKKSDKEWVQFSFAQYLD EVLWKKEKKESESKDLDASKF AEAGLFAPDAFGTGK VYDFVGNFKVTKVKVKEFDEK EVDGSKKAK

14. PopUID.064  
Frame 3

MT428497

GACTGAAGCATCTGAAGACCTGTTCTTAAAGTCGACCTTCCCATCAAAACCACTTTTGTTCAGAAAGAAAGGAGCAAGGAATGGTACAGTTCAAGTTCGCTCCGCAAGTCTCGATGAAGTCTCTCTGGAAGAAAGAAAGGAATCAAGACCTGATGCTCAAGTTCTGCAAGAGCTGGCTCTTTTGCCCTGATGACTCGTACCGGAAAGTTTACAGCTTCGTGCGAAATCTCAAGTCAACAAGTCAAGTTTCGAGGATAAGGAAGTCGGAAATCAAGAAGGCCCAATA

LKHAEDLFLFKL DLSHAKPLLFKKKSDKEWVQFSFAQYLD EVLWKKEKKESESKDLDASKF AEAGLFAPDAFGTGK VYDFVGNFKVTKVKVKEFDEK EVDGSKKAK

15. PopUID.042  
Frame 3

MT428475

GACTGAAGCATCTGAAGACCTGTTCTTAAAGTCGACCTTCCCATCAAAACCACTTTTGTTCAGAAAGAAAGGAGCAAGGAATGGTACAGTTCAAGTTCGCTCCGCAAGTCTCGATGAAGTCTCTCTGGAAGAAAGAAAGGAATCAAGACCTGATGCTCAAGTTCTGCAAGAGCTGGCTCTTTTGCCCTGATGACTCGTACCGGAAAGTTTACAGCTTCGTGCGAAATCTCAAGTCAACAAGTCAAGTTTCGAGGATAAGGAAGTCGGAAATCAAGAAGGCCCAATA

LKHAEDLFLFKL DLSHAKPLLFKKKSDKEWVQFSFAQYLD EVLWKKEKKESESKDLDASKF AEAGLFAPDAFGTGK VYDFVGNFKVTKVKVKEFDEK EVDGSKKAK

16. PopUID.066  
Frame 3

MT428499

GACTGAAGCATCTGAAGACCTGTTCTTAAAGTCGACCTTCCCATCAAAACCACTTTTGTTCAGAAAGAAAGGAGCAAGGAATGGTACAGTTCAAGTTCGCTCCGCAAGTCTCGATGAAGTCTCTCTGGAAGAAAGAAAGGAATCAAGACCTGATGCTCAAGTTCTGCAAGAGCTGGCTCTTTTGCCCTGATGACTCGTACCGGAAAGTTTACAGCTTCGTGCGAAATCTCAAGTCAACAAGTCAAGTTTCGAGGATAAGGAAGTCGGAAATCAAGAAGGCCCAATA

LKHAEDLFLFKL DLSHAKPLLFKKKSDKEWVQFSFAQYLD EVLWKKEKKESESKDLDASKF AEAGLFAPDAFGTGK VYDFVGNFKVTKVKVKEFDEK EVDGSKKAK

17. PopUID.053  
Frame 3

MT428486

GACTGAAGCATCTGAAGACCTGTTCTTAAAGTCGACCTTCCCATCAAAACCACTTTTGTTCAGAAAGAAAGGAGCAAGGAATGGTACAGTTCAAGTTCGCTCCGCAAGTCTCGATGAAGTCTCTCTGGAAGAAAGAAAGGAATCAAGACCTGATGCTCAAGTTCTGCAAGAGCTGGCTCTTTTGCCCTGATGACTCGTACCGGAAAGTTTACAGCTTCGTGCGAAATCTCAAGTCAACAAGTCAAGTTTCGAGGATAAGGAAGTCGGAAATCAAGAAGGCCCAATA

LKHAEDLFLFKL DLSHAKPLLFKKKSDKEWVQFSFAQYLD EVLWKKEKKESESKDLDASKF AEAGLFAPDAFGTGK VYDFVGNFKVTKVKVKEFDEK EVDGSKKAK

18. PopUID.027  
Frame 3

MT428460

GACTGAAGCATCTGAAGACCTGTTCTTAAAGTCGACCTTCCCATCAAAACCACTTTTGTTCAGAAAGAAAGGAGCAAGGAATGGTACAGTTCAAGTTCGCTCCGCAAGTCTCGATGAAGTCTCTCTGGAAGAAAGAAAGGAATCAAGACCTGATGCTCAAGTTCTGCAAGAGCTGGCTCTTTTGCCCTGATGACTCGTACCGGAAAGTTTACAGCTTCGTGCGAAATCTCAAGTCAACAAGTCAAGTTTCGAGGATAAGGAAGTCGGAAATCAAGAAGGCCCAATA

LKHAEDLFLFKL DLSHAKPLLFKKKSDKEWVQFSFAQYLD EVLWKKEKKESESKDLDASKF AEAGLFAPDAFGTGK VYDFVGNFKVTKVKVKEFDEK EVDGSKKAK

19. PopUID.029  
Frame 3

MT428462

GACTGAAGCATCTGAAGACCTGTTCTTAAAGTCGACCTTCCCATCAAAACCACTTTTGTTCAGAAAGAAAGGAGCAAGGAATGGTACAGTTCAAGTTCGCTCCGCAAGTCTCGATGAAGTCTCTCTGGAAGAAAGAAAGGAATCAAGACCTGATGCTCAAGTTCTGCAAGAGCTGGCTCTTTTGCCCTGATGACTCGTACCGGAAAGTTTACAGCTTCGTGCGAAATCTCAAGTCAACAAGTCAAGTTTCGAGGATAAGGAAGTCGGAAATCAAGAAGGCCCAATA

LKHAEDLFLFKL DLSHAKPLLFKKKSDKEWVQFSFAQYLD EVLWKKEKKESESKDLDASKF AEAGLFAPDAFGTGK VYDFVGNFKVTKVKVKEFDEK EVDGSKKAK

20. PopUID.074  
Frame 3

MT428507

GACTGAAGCATCTGAAGACCTGTTCTTAAAGTCGACCTTCCCATCAAAACCACTTTTGTTCAGAAAGAAAGGAGCAAGGAATGGTACAGTTCAAGTTCGCTCCGCAAGTCTCGATGAAGTCTCTCTGGAAGAAAGAAAGGAATCAAGACCTGATGCTCAAGTTCTGCAAGAGCTGGCTCTTTTGCCCTGATGACTCGTACCGGAAAGTTTACAGCTTCGTGCGAAATCTCAAGTCAACAAGTCAAGTTTCGAGGATAAGGAAGTCGGAAATCAAGAAGGCCCAATA

LKHAEDLFLFKL DLSHAKPLLFKKKSDKEWVQFSFAQYLD EVLWKKEKKESESKDLDASKF AEAGLFAPDAFGTGK VYDFVGNFKVTKVKVKEFDEK EVDGSKKAK

21. PopUID.082  
Frame 3

MT428515

GACTGAAGCATCTGAAGACCTGTTCTTAAAGTCGACCTTCCCATCAAAACCACTTTTGTTCAGAAAGAAAGGAGCAAGGAATGGTACAGTTCAAGTTCGCTCCGCAAGTCTCGATGAAGTCTCTCTGGAAGAAAGAAAGGAATCAAGACCTGATGCTCAAGTTCTGCAAGAGCTGGCTCTTTTGCCCTGATGACTCGTACCGGAAAGTTTACAGCTTCGTGCGAAATCTCAAGTCAACAAGTCAAGTTTCGAGGATAAGGAAGTCGGAAATCAAGAAGGCCCAATA

LKHAEDLFLFKL DLSHAKPLLFKKKSDKEWVQFSFAQYLD EVLWKKEKKESESKDLDASKF AEAGLFAPDAFGTGK VYDFVGNFKVTKVKVKEFDEK EVDGSKKAK

22. PopUID.069  
Frame 3

MT428502

GACTGAAGCATCTGAAGACCTGTTCTTAAAGTCGACCTTCCCATCAAAACCACTTTTGTTCAGAAAGAAAGGAGCAAGGAATGGTACAGTTCAAGTTCGCTCCGCAAGTCTCGATGAAGTCTCTCTGGAAGAAAGAAAGGAATCAAGACCTGATGCTCAAGTTCTGCAAGAGCTGGCTCTTTTGCCCTGATGACTCGTACCGGAAAGTTTACAGCTTCGTGCGAAATCTCAAGTCAACAAGTCAAGTTTCGAGGATAAGGAAGTCGGAAATCAAGAAGGCCCAATA

LKHAEDLFLFKL DLSHAKPLLFKKKSDKEWVQFSFAQYLD EVLWKKEKKESESKDLDASKF AEAGLFAPDAFGTGK VYDFVGNFKVTKVKVKEFDEK EVDGSKKAK

23. PopUID.017  
Frame 3

MT428511

GACTGAAGCATCTGAAGACCTGTTCTTAAAGTCGACCTTCCCATCAAAACCACTTTTGTTCAGAAAGAAAGGAGCAAGGAATGGTACAGTTCAAGTTCGCTCCGCAAGTCTCGATGAAGTCTCTCTGGAAGAAAGAAAGGAATCAAGACCTGATGCTCAAGTTCTGCAAGAGCTGGCTCTTTTGCCCTGATGACTCGTACCGGAAAGTTTACAGCTTCGTGCGAAATCTCAAGTCAACAAGTCAAGTTTCGAGGATAAGGAAGTCGGAAATCAAGAAGGCCCAATA

LKHAEDLFLFKL DLSHAKPLLFKKKSDKEWVQFSFAQYLD EVLWKKEKKESESKDLDASKF AEAGLFAPDAFGTGK VYDFVGNFKVTKVKVKEFDEK EVDGSKKAK

24. PopUID.055  
Frame 3

MT428488

GACTGAAGCATCTGAAGACCTGTTCTTAAAGTCGACCTTCCCATCAAAACCACTTTTGTTCAGAAAGAAAGGAGCAAGGAATGGTACAGTTCAAGTTCGCTCCGCAAGTCTCGATGAAGTCTCTCTGGAAGAAAGAAAGGAATCAAGACCTGATGCTCAAGTTCTGCAAGAGCTGGCTCTTTTGCCCTGATGACTCGTACCGGAAAGTTTACAGCTTCGTGCGAAATCTCAAGTCAACAAGTCAAGTTTCGAGGATAAGGAAGTCGGAAATCAAGAAGGCCCAATA

LKHAEDLFLFKL DLSHAKPLLFKKKSDKEWVQFSFAQYLD EVLWKKEKKESESKDLDASKF AEAGLFAPDAFGTGK VYDFVGNFKVTKVKVKEFDEK EVDGSKKAK

25. PopUID.086  
Frame 3

MT428519

GACTGAAGCATCTGAAGACCTGTTCTTAAAGTCGACCTTCCCATCAAAACCACTTTTGTTCAGAAAGAAAGGAGCAAGGAATGGTACAGTTCAAGTTCGCTCCGCAAGTCTCGATGAAGTCTCTCTGGAAGAAAGAAAGGAATCAAGACCTGATGCTCAAGTTCTGCAAGAGCTGGCTCTTTTGCCCTGATGACTCGTACCGGAAAGTTTACAGCTTCGTGCGAAATCTCAAGTCAACAAGTCAAGTTTCGAGGATAAGGAAGTCGGAAATCAAGAAGGCCCAATA

LKHAEDLFLFKL DLSHAKPLLFKKKSDKEWVQFSFAQYLD EVLWKKEKKESESKDLDASKF AEAGLFAPDAFGTGK VYDFVGNFKVTKVKVKEFDEK EVDGSKKAK

26. PopUID.047  
Frame 3

MT428480

GACTGAAGCATCTGAAGACCTGTTCTTAAAGTCGACCTTCCCATCAAAACCACTTTTGTTCAGAAAGAAAGGAGCAAGGAATGGTACAGTTCAAGTTCGCTCCGCAAGTCTCGATGAAGTCTCTCTGGAAGAAAGAAAGGAATCAAGACCTGATGCTCAAGTTCTGCAAGAGCTGGCTCTTTTGCCCTGATGACTCGTACCGGAAAGTTTACAGCTTCGTGCGAAATCTCAAGTCAACAAGTCAAGTTTCGAGGATAAGGAAGTCGGAAATCAAGAAGGCCCAATA

LKHAEDLFLFKL DLSHAKPLLFKKKSDKEWVQFSFAQYLD EVLWKKEKKESESKDLDASKF AEAGLFAPDAFGTGK VYDFVGNFKVTKVKVKEFDEK EVDGSKKAK

chitose B

|                           |             |                                                                                                                                                                                                                                                                                                                                                                                                                                                                                                                                                |
|---------------------------|-------------|------------------------------------------------------------------------------------------------------------------------------------------------------------------------------------------------------------------------------------------------------------------------------------------------------------------------------------------------------------------------------------------------------------------------------------------------------------------------------------------------------------------------------------------------|
| Consensus<br>Frame 3      | GenBank no. | <div><div><div>110120130140150160170180190200210220230240250260270280290301</div><div>CAATCAAGCATCTGATGACCTGTTCTTCAAGCTCAACCTTTCCCATGCAAAACCACTTTTGTTCAGAAAGAAGAGCGACAAGGAATGGGTACAGTTCAGCTTCGCCCAGTACCTTCGACGAAGTTCCTCTGGAAAGAAAAGAAGGAATCCAAGACCTCGATGCCTCCAAGTTTGCAGAACTGGTCTTTTGGCCCTGATGCTTCGGTACCGAAAAGTTTACGACTTCGTCGGAACTTCAAGGTCACCAAGGTCAAGTTCGAGGATAAGGAAATCGGAGATTCAAAGAAGGCCAAATA</div><div>LKKHAEEDLFFFKLNNLSHAKPPLLFFKKKKSDDKEWVQFSFAQYLLDEVLLWKEKKKESKDLLDASKFAEAGLFPDAFPGTGKVVYDFVGNFKVTKVKKFEDKKEVGDSSKKAK</div></div></div> |
| Identity<br>Frame 3       | MT428473    | GACTGAAGCATCTGCTGAAGACCTGTTCTTCAAGCTCAACCTTTCCCATGCAAAACCACTTTTGTTCAGAAAGAAGAGCGACAAGGAATGGGTACAGTTCAGCTTCGCCCAGTACCTTCGACGAAGTTCCTCTGGAAAGAAAAGAAGGAATCCAAGACCTCGATGCCTCCAAGTTTGCAGAACTGGTCTTTTGGCCCTGATGCTTCGGTACCGAAAAGTTTACGACTTCGTCGGAACTTCAAGGTCACCAAGGTCAAGTTCGAGGATAAGGAAATCGGAGATTCAAAGAAGGCCAAATA                                                                                                                                                                                                                                    |
| 1. PopUID.040<br>Frame 3  | MT428471    | GACTGAAGCATCTGCTGAAGACCTGTTCTTCAAGCTCAACCTTTCCCATGCAAAACCACTTTTGTTCAGAAAGAAGAGCGACAAGGAATGGGTACAGTTCAGCTTCGCCCAGTACCTTCGACGAAGTTCCTCTGGAAAGAAAAGAAGGAATCCAAGACCTCGATGCCTCCAAGTTTGCAGAACTGGTCTTTTGGCCCTGATGCTTCGGTACCGAAAAGTTTACGACTTCGTCGGAACTTCAAGGTCACCAAGGTCAAGTTCGAGGATAAGGAAATCGGAGATTCAAAGAAGGCCAAATA                                                                                                                                                                                                                                    |
| 2. PopUID.038<br>Frame 3  | MT428440    | GACTGAAGCATGCTGAAGACCTGTTCTTCAAGCTCAACCTTTCCCATGCAAAACCACTTTTGTTCAGAAAGAAGAGCGACAAGGAATGGGTACAGTTCAGCTTCGCCCAGTACCTTCGACGAAGTTCCTCTGGAAAGAAAAGAAGGAATCCAAGACCTCGATGCCTCCAAGTTTGCAGAACTGGTCTTTTGGCCCTGATGCTTCGGTACCGAAAAGTTTACGACTTCGTCGGAACTTCAAGGTCACCAAGGTCAAGTTCGAGGATAAGGAAATCGGAGATTCAAAGAAGGCCAAATA                                                                                                                                                                                                                                      |
| 3. PopUID.007<br>Frame 3  | MT428485    | GACTGAAGCATGCTGAAGACCTGTTCTTCAAGCTCAACCTTTCCCATGCAAAACCACTTTTGTTCAGAAAGAAGAGCGACAAGGAATGGGTACAGTTCAGCTTCGCCCAGTACCTTCGACGAAGTTCCTCTGGAAAGAAAAGAAGGAATCCAAGACCTCGATGCCTCCAAGTTTGCAGAACTGGTCTTTTGGCCCTGATGCTTCGGTACCGAAAAGTTTACGACTTCGTCGGAACTTCAAGGTCACCAAGGTCAAGTTCGAGGATAAGGAAATCGGAGATTCAAAGAAGGCCAAATA                                                                                                                                                                                                                                      |
| 4. PopUID.052<br>Frame 3  | MT428510    | GACTGAAGCATGCTGAAGACCTGTTCTTCAAGCTCAACCTTTCCCATGCAAAACCACTTTTGTTCAGAAAGAAGAGCGACAAGGAATGGGTACAGTTCAGCTTCGCCCAGTACCTTCGACGAAGTTCCTCTGGAAAGAAAAGAAGGAATCCAAGACCTCGATGCCTCCAAGTTTGCAGAACTGGTCTTTTGGCCCTGATGCTTCGGTACCGAAAAGTTTACGACTTCGTCGGAACTTCAAGGTCACCAAGGTCAAGTTCGAGGATAAGGAAATCGGAGATTCAAAGAAGGCCAAATA                                                                                                                                                                                                                                      |
| 5. PopUID.077<br>Frame 3  | MT428534    | GACTGAAGCATGCTGAAGACCTGTTCTTCAAGCTCAACCTTTCCCATGCAAAACCACTTTTGTTCAGAAAGAAGAGCGACAAGGAATGGGTACAGTTCAGCTTCGCCCAGTACCTTCGACGAAGTTCCTCTGGAAAGAAAAGAAGGAATCCAAGACCTCGATGCCTCCAAGTTTGCAGAACTGGTCTTTTGGCCCTGATGCTTCGGTACCGAAAAGTTTACGACTTCGTCGGAACTTCAAGGTCACCAAGGTCAAGTTCGAGGATAAGGAAATCGGAGATTCAAAGAAGGCCAAATA                                                                                                                                                                                                                                      |
| 6. PopUID.101<br>Frame 3  | MT428540    | GACTGAAGCATGCTGAAGACCTGTTCTTCAAGCTCAACCTTTCCCATGCAAAACCACTTTTGTTCAGAAAGAAGAGCGACAAGGAATGGGTACAGTTCAGCTTCGCCCAGTACCTTCGACGAAGTTCCTCTGGAAAGAAAAGAAGGAATCCAAGACCTCGATGCCTCCAAGTTTGCAGAACTGGTCTTTTGGCCCTGATGCTTCGGTACCGAAAAGTTTACGACTTCGTCGGAACTTCAAGGTCACCAAGGTCAAGTTCGAGGATAAGGAAATCGGAGATTCAAAGAAGGCCAAATA                                                                                                                                                                                                                                      |
| 7. PopUID.107<br>Frame 3  | MT428437    | GACTGAAGCATGCTGAAGACCTGTTCTTCAAGCTCAACCTTTCCCATGCAAAACCACTTTTGTTCAGAAAGAAGAGCGACAAGGAATGGGTACAGTTCAGCTTCGCCCAGTACCTTCGACGAAGTTCCTCTGGAAAGAAAAGAAGGAATCCAAGACCTCGATGCCTCCAAGTTTGCAGAACTGGTCTTTTGGCCCTGATGCTTCGGTACCGAAAAGTTTACGACTTCGTCGGAACTTCAAGGTCACCAAGGTCAAGTTCGAGGATAAGGAAATCGGAGATTCAAAGAAGGCCAAATA                                                                                                                                                                                                                                      |
| 8. PopUID.004<br>Frame 3  | MT428527    | GACTGAAGCATGCTGAAGACCTGTTCTTCAAGCTCAACCTTTCCCATGCAAAACCACTTTTGTTCAGAAAGAAGAGCGACAAGGAATGGGTACAGTTCAGCTTCGCCCAGTACCTTCGACGAAGTTCCTCTGGAAAGAAAAGAAGGAATCCAAGACCTCGATGCCTCCAAGTTTGCAGAACTGGTCTTTTGGCCCTGATGCTTCGGTACCGAAAAGTTTACGACTTCGTCGGAACTTCAAGGTCACCAAGGTCAAGTTCGAGGATAAGGAAATCGGAGATTCAAAGAAGGCCAAATA                                                                                                                                                                                                                                      |
| 9. PopUID.094<br>Frame 3  | MT428523    | GACTGAAGCATGCTGAAGACCTGTTCTTCAAGCTCAACCTTTCCCATGCAAAACCACTTTTGTTCAGAAAGAAGAGCGACAAGGAATGGGTACAGTTCAGCTTCGCCCAGTACCTTCGACGAAGTTCCTCTGGAAAGAAAAGAAGGAATCCAAGACCTCGATGCCTCCAAGTTTGCAGAACTGGTCTTTTGGCCCTGATGCTTCGGTACCGAAAAGTTTACGACTTCGTCGGAACTTCAAGGTCACCAAGGTCAAGTTCGAGGATAAGGAAATCGGAGATTCAAAGAAGGCCAAATA                                                                                                                                                                                                                                      |
| 10. PopUID.090<br>Frame 3 | MT428435    | GACTGAAGCATGCTGAAGACCTGTTCTTCAAGCTCAACCTTTCCCATGCAAAACCACTTTTGTTCAGAAAGAAGAGCGACAAGGAATGGGTACAGTTCAGCTTCGCCCAGTACCTTCGACGAAGTTCCTCTGGAAAGAAAAGAAGGAATCCAAGACCTCGATGCCTCCAAGTTTGCAGAACTGGTCTTTTGGCCCTGATGCTTCGGTACCGAAAAGTTTACGACTTCGTCGGAACTTCAAGGTCACCAAGGTCAAGTTCGAGGATAAGGAAATCGGAGATTCAAAGAAGGCCAAATA                                                                                                                                                                                                                                      |
| 11. PopUID.002<br>Frame 3 |             | LKKHAEEDLFFFKLNNLSHAKPPLLFFKKKKSDDKEWVQFSFAQYLLDEVLLWKEKKKESKDLLDASKFAEAGLFPDAFPGTGKVVYDFVGNFKVTKVKKFEDKKEVGDSSKKAK                                                                                                                                                                                                                                                                                                                                                                                                                            |

[illegible]
